# Supplementary material
Source: PubMed Central journal article supplement (PMC4115609)

## Supplementary figure 2

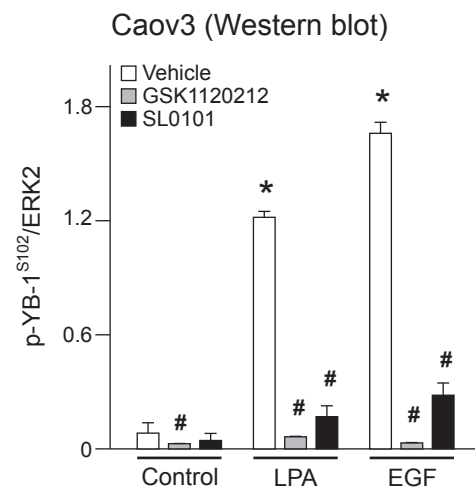

# Supplementary figure 3

SKOV3

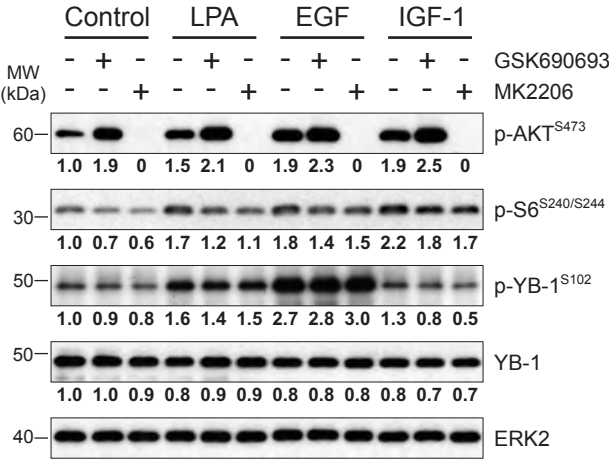

### Supplementary figure 4

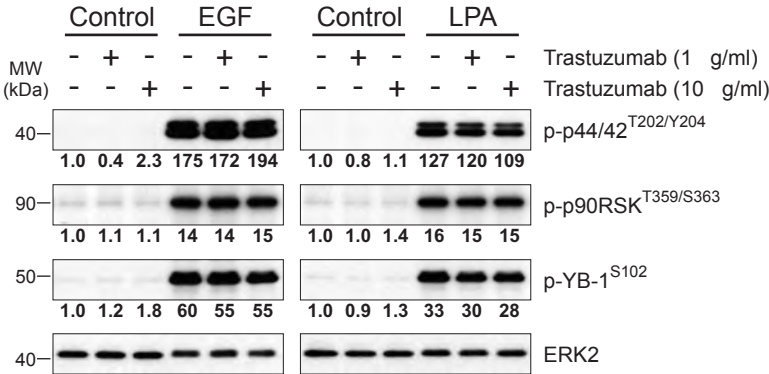

Supplementary figure 5

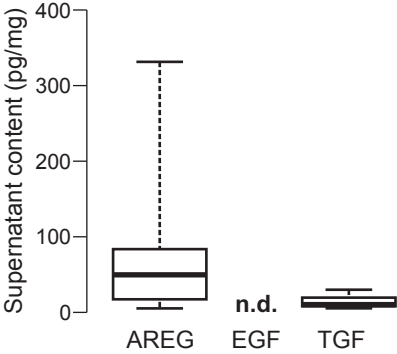

Supplementary figure 6

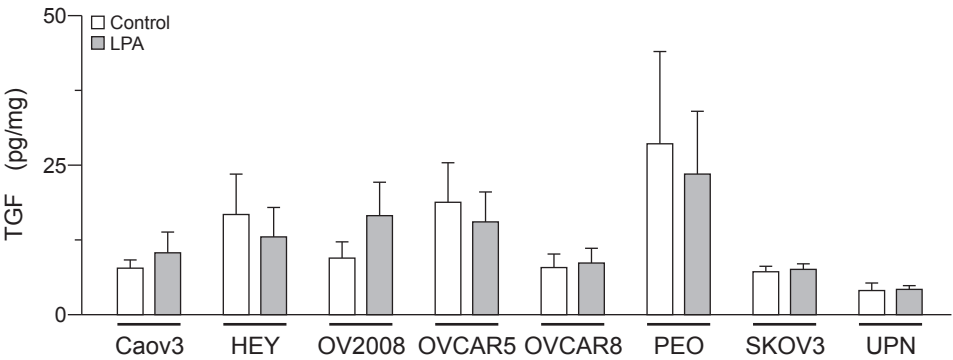

# Supplementary figure 7

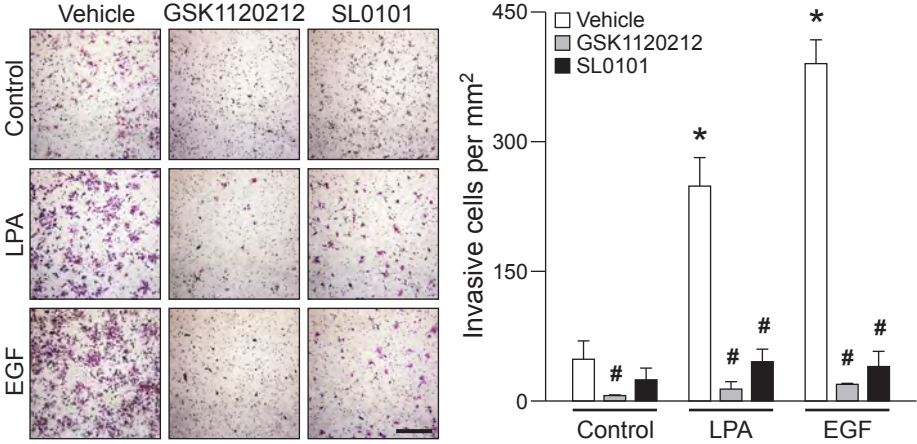

### Supplementary figure 8

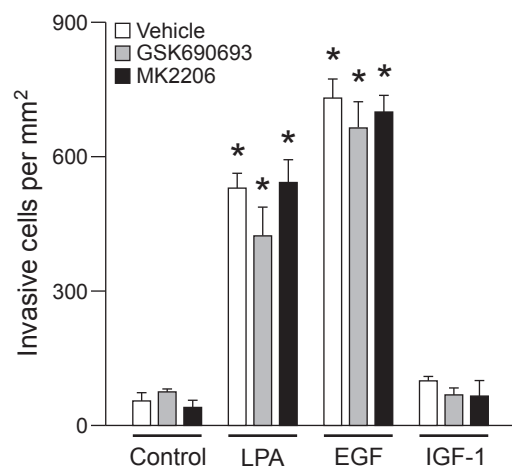



### Supplementary figure 9

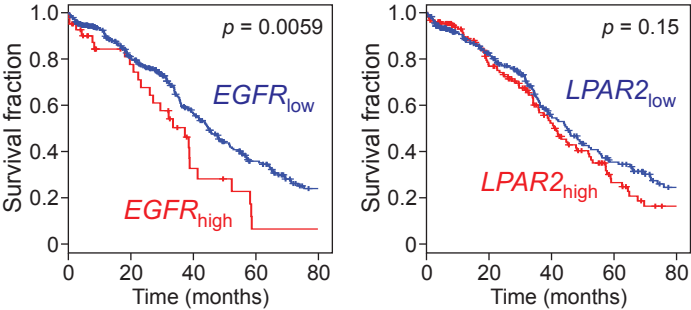

## Supplementary figure 10

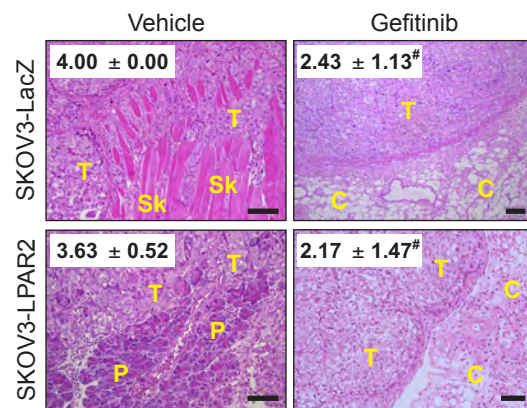

Supplement: NIHMS607350-supplement-01.pdf [file NIHMS607350-supplement-01.pdf]
